# Supplementary material
Source: publisher figshare collection journal article supplement (https://sage.figshare.com/ndownloader/files/14375771)
Supplement: Supplementary file 1 [file 14375771]

**Supplemental Table 1.** Ingredients and effects of the Shen cao formula

| Latin name                                                                            | Main chemical composition                                                                                                                                                                                                                                                                                                                                          | Described effects of the main chemicals (effects on blood are marked bold)                                                                                                                                                                                                                                                               |
|---------------------------------------------------------------------------------------|--------------------------------------------------------------------------------------------------------------------------------------------------------------------------------------------------------------------------------------------------------------------------------------------------------------------------------------------------------------------|------------------------------------------------------------------------------------------------------------------------------------------------------------------------------------------------------------------------------------------------------------------------------------------------------------------------------------------|
| <i>Adenophora stricta</i><br>(dry root)                                               | Coumarins, glycosides, volatile oils, lignans, polyacetylene, amino acids, trace elements.                                                                                                                                                                                                                                                                         | Immunoregulation, antitussive and expectorant, anti-mutation, anti-carcinogenic and anti-tumor, anti-bacterial and anti-fungal, anti-oxidant.                                                                                                                                                                                            |
| <i>Dendrobium nobile</i><br>(stem)                                                    | Polysaccharides, alkaloids, phenanthrene compounds, amino acids                                                                                                                                                                                                                                                                                                    | Enhance the body immunity and anti-aging, anti-tumor, hypoglycemia.                                                                                                                                                                                                                                                                      |
| <i>Agrimonia pilosa</i><br>(entire plant without roots)                               | <i>Agrimonia pilosa</i> contains certain chemical components such as agrimonolide, coumarin, tannins, as well as flavonoids, phenylpropanoids, and triterpenes                                                                                                                                                                                                     | Anti-tumor, hypoglycemic, analgesic, anti-inflammatory, hemostasis, blood pressure lowering, antiarrhythmia, antimalarial and insecticidal effects, <b>effect on platelet aggregation, coagulation function and hemorheology</b> [25]                                                                                                    |
| <i>Lithospermum erythrorhizon</i><br>(root)                                           | The enzyme 4-hydroxybenzoate geranyltransferase utilizes geranyl diphosphate and 4-hydroxybenzoate to produce 3-geranyl-4-hydroxybenzoate and diphosphate. Biosynthetically, alkannin is produced in plants from the intermediates 4-hydroxybenzoic acid and geranyl pyrophosphate. This enzyme is involved in shikonin biosynthesis                               | Contraceptive, anti-virus, anti-inflammation, anti-tumor, liver protection effects<br><b>Extracts of ethyl acetate from Xinjiang <i>Lithospermum erythrorhizon</i> can significantly shorten CT (Clotting Time), BT (Bleeding Time), increase platelet count, shorten thrombin time (TT), and increase fibrinogen content (FIB)</b> [26] |
| <i>Eclipta prostrata</i><br>(entire plant)                                            | <i>Eclipta prostrata</i> contains various phytochemicals, such as coumestans, polypeptides, polyacetylenes, thiophene derivatives, steroids, sterols, triterpenes, and flavonoids.                                                                                                                                                                                 | Effects on cardiovascular system, effects on central nervous system, antimicrobial effect, <b>inhibition of hemorrhagic activity</b> [27]                                                                                                                                                                                                |
| <i>Lycium chinense</i><br>(fruits, leaves and roots)                                  | The fruit's composition is similar to that of <i>L. barbarum</i> . Polysaccharides, carotenoids and flavonoids are the typical metabolites. Rutin is the main flavonoid. The main carotenoid is zeaxanthin dipalmitate (49% of the carotenoid fraction). The fruit further contains zeaxanthin, $\beta$ -carotene, two cerebrosides, and three pyrrole derivatives | Regulation of non-specific immune function, regulation of specific immune function, antioxidation, anti-aging, hypolipidemic, hypoglycemic, anti-tumor, anti-mutagenic effect.                                                                                                                                                           |
| <i>Carapax Testudinis</i><br>(ventral and dorsal armour of <i>chinemys reevesii</i> ) | Contains animal gelatin, Keratin, Fat, calcium, phosphorus, Asparagic acid ) Threonine, Serine, Glutamic acid, Proline, Glycine, Alanine, Cysteine, Valine, Methionine, Isoleucine, Leucine, Tyrosine, Phenylalanine, Lysine, Histidine, Arginine, Tryptophane                                                                                                     | Effects on immune function and reproductive system; anti-tumor; pathological model of animal "Yin deficiency" syndrome.                                                                                                                                                                                                                  |
